# Supplementary material
Source: HighWire-hosted journal article supplement (http://rc.rcjournal.com/highwire/filestream/25881/field_highwire_adjunct_files/0/RC-01414.R2_Melani_Supplement.pdf)
Supplement: RC-01414.R2_Melani_Supplement.pdf [file RC-01414.R2_Melani_Supplement.pdf]

## ONLINE DATA SUPPLEMENT

Supplementary Appendix 1. Composition and some characteristics of proprietary marketed nebulized inhaled corticosteroids\*

| Drug                                                 | BUD                                                                                                                              | FLU                                                                                                             | BDP                                                                          | FP                                                                                                                               |
|------------------------------------------------------|----------------------------------------------------------------------------------------------------------------------------------|-----------------------------------------------------------------------------------------------------------------|------------------------------------------------------------------------------|----------------------------------------------------------------------------------------------------------------------------------|
| Strength                                             | 0.125, 0.25 and 0.5 mg/ml                                                                                                        | 0.5 and 1 mg/ml                                                                                                 | 0.4 mg/ml                                                                    | 0.5 and 1 mg/ml                                                                                                                  |
| Non drug composition                                 | Disodium edetate, polysorbate 80, citric acid monohydrate, trisodium citrate dihydrate, sodium chloride, and water for injection | Propylene glycol, sodium chloride, citric acid monohydrate, trisodium citrate dihydrate and water for injection | Polysorbate 20, sorbitan laureate, sodium chloride, and water for injection. | Polysorbate 20, sorbitan laureate, sodium phosphate dihydrate, dibasic sodium phosphate, sodium chloride and water for injection |
| Osmolarity, mOsmol/Kg                                | 280                                                                                                                              | NA                                                                                                              | 300                                                                          | 290                                                                                                                              |
| pH                                                   | 4.4                                                                                                                              | NA                                                                                                              | 4.5-5.0                                                                      | 6.0                                                                                                                              |
| Dynamic viscosity, mPas                              | 1.1                                                                                                                              | NA                                                                                                              | 1.8                                                                          | 0.97                                                                                                                             |
| Surface tension, mN/m                                | 30-50                                                                                                                            | NA                                                                                                              | 55-60                                                                        | 53.8                                                                                                                             |
| Water solubility mcg/ml                              | 20                                                                                                                               | 140                                                                                                             | NA                                                                           | 0.14                                                                                                                             |
| Mean diameter of micronized particles, $\mu\text{m}$ | 2.4-3.0                                                                                                                          | NA                                                                                                              | 3.7                                                                          | NA                                                                                                                               |

Legend: BUD = nebulized budesonide; BDP = nebulized beclomethasone dipropionate; FP = nebulized fluticasone propionate; FLU = febulized flunisolide; NA =not available

\*From reference 33-35 and the following links:

[http://www.pharmcast.com/Patents100/Yr2005/Nov2005/112205/6967017\\_Steroid112205.htm](http://www.pharmcast.com/Patents100/Yr2005/Nov2005/112205/6967017_Steroid112205.htm)

<http://www.docstoc.com/docs/51553882/Fluticasone-Propionate-Nebulizable-Formulations---Patent-5993781#viewer-area>

[http://www.surechem.org/index.php?Action=document&docId=1009463&db=EPA&tab=desc&lang=&db\\_query=0%3A%3A0%3A%3A0%3A&markupType=all](http://www.surechem.org/index.php?Action=document&docId=1009463&db=EPA&tab=desc&lang=&db_query=0%3A%3A0%3A%3A0%3A&markupType=all)

## ONLINE DATA SUPPLEMENT

Supplementary appendix 2. *In vitro* studies evaluating aerosol properties of nebulized budesonide

| Nebulizer system              | Total drug dosage in mg | Fill volume in ml | MMAD in $\mu\text{m}$ | GSD in $\mu\text{m}$ | Respirable fraction in % of inhaled mass | Inhaled Mass, mean % of label charge                                | Reference number |
|-------------------------------|-------------------------|-------------------|-----------------------|----------------------|------------------------------------------|---------------------------------------------------------------------|------------------|
| SideStream/ 8 lpm             | 1                       | 4                 | 3.6 <sup>d</sup>      | 1.7                  | 75                                       | 35 <sup>1</sup>                                                     | 36               |
| AeroTechII/ 10 lpm            | 1                       | 4                 | 2.4 <sup>d</sup>      | 1.6                  | 92                                       | 18 <sup>1</sup>                                                     | 36               |
| AeroTechII/ 6 lpm             | 1                       | 4                 | 2.3 <sup>d</sup>      | 1.4                  | 98                                       | 6 <sup>1</sup>                                                      | 36               |
| Aerosonic ultrasonic          | 1                       | 4                 | 2.9 <sup>d</sup>      | 1.4                  | 92                                       | 9 <sup>1</sup>                                                      | 36               |
| LL/ Boy 37                    | 1                       | 2                 |                       |                      |                                          | 23 <sup>6</sup>                                                     | 45               |
| LL/ Boy 38G                   | 1                       | 2                 |                       |                      |                                          | 20 <sup>6</sup>                                                     | 45               |
| LC Plus/ Boy 38G              | 1                       | 2                 |                       |                      |                                          | 23 <sup>6</sup>                                                     | 45               |
| LC Plus/ WalkBoy              | 1                       | 2                 |                       |                      |                                          | 20 <sup>6</sup>                                                     | 45               |
| Cirrus/ Novair II             | 0.5                     | 2                 |                       |                      |                                          | 21 <sup>2</sup> /7 <sup>4</sup> /7 <sup>11</sup> /1 <sup>12</sup>   | 46               |
| Sidestream/ PortaNeb 50       | 0.5                     | 2                 |                       |                      |                                          | 30 <sup>2</sup> /4 <sup>4</sup> /4 <sup>11</sup> /1 <sup>12</sup>   | 46               |
| LC Plus/ ProNebTurbo          | 0.5                     | 2                 |                       |                      |                                          | 35 <sup>2</sup> /16 <sup>4</sup> /15 <sup>11</sup> /5 <sup>12</sup> | 46               |
| LC Plus/ Master               | 1                       | 2                 | 5.0 <sup>c</sup>      | 2.1                  |                                          | 16.6 <sup>10</sup>                                                  | 47               |
| LC Plus/ PulmoAide            | 1                       | 2                 | 5.2 <sup>c</sup>      | 2.3                  |                                          | 17.8 <sup>10</sup>                                                  | 47               |
| Inspiron/ PulmoAide           | 1                       | 2                 | 4.7 <sup>c</sup>      | 2.1                  |                                          | 14.8 <sup>10</sup>                                                  | 47               |
| MistyNeb/ PulmoAide           | 1                       | 2                 | 5.5 <sup>c</sup>      | 2.3                  |                                          | 14.6 <sup>10</sup>                                                  | 47               |
| Aiolos/ CR60                  | 1                       | 2                 | 4.3 <sup>c</sup>      | 2.1                  |                                          | 13.4 <sup>10</sup>                                                  | 47               |
| UpDraft II/ Hudson            | 1                       | 2                 | 3.8 <sup>c</sup>      | 2.2                  |                                          | 14.2 <sup>10</sup>                                                  | 47               |
| UpDraft II/ MediMist          | 1                       | 2                 |                       |                      |                                          | 14.5 <sup>10</sup>                                                  | 47               |
| UpDraft II/ PulmoAide         | 1                       | 2                 | 4.3 <sup>c</sup>      | 2.9                  |                                          | 14.6 <sup>10</sup>                                                  | 47               |
| DeVilbiss ultrasonic          | 1                       | 2                 |                       |                      |                                          | 4.0 <sup>10</sup>                                                   | 47               |
| DeVilbiss 646/ PulmoAide      | 1                       | 2                 |                       |                      |                                          | 7.6 <sup>10</sup>                                                   | 47               |
| DeVilbiss 644/ PulmoAide      | 1                       | 2                 |                       |                      |                                          | 7.5 <sup>10</sup>                                                   | 47               |
| AeroTechT/ Schuko             | 1                       | 2                 |                       |                      |                                          | 9.0 <sup>10</sup>                                                   | 47               |
| AeroTechY/ Schuko             | 1                       | 2                 |                       |                      |                                          | 7.5 <sup>10</sup>                                                   | 47               |
| PARI 1460 DuraNeb 2000        | 1                       | 2                 |                       |                      |                                          | 9.9 <sup>10</sup>                                                   | 47               |
| PulmoNeb/ PulmoAide           | 1                       | 2                 | 4.2 <sup>c</sup>      | 2.0                  |                                          | 9.6 <sup>10</sup>                                                   | 47               |
| PulmoNeb/ PulmoAide Traveller | 1                       | 2                 | 4.0 <sup>c</sup>      | 2.1                  |                                          | 11.8 <sup>10</sup>                                                  | 47               |
| AvaNeb/ Hudson                | 1                       | 2                 | 3.8 <sup>c</sup>      | 2.0                  |                                          | 12.7 <sup>10</sup>                                                  | 47               |
| AvaNeb/ MediMist              | 1                       | 2                 |                       |                      |                                          | 13.5 <sup>10</sup>                                                  | 47               |
| AvaNeb/ PulmoAide             | 1                       | 2                 | 4.2 <sup>c</sup>      | 2.0                  |                                          | 13.8 <sup>10</sup>                                                  | 47               |
| IsoNeb A/ Hudson              | 1                       | 2                 |                       |                      |                                          | 2.6 <sup>10</sup>                                                   | 47               |
| IsoNeb B/ Hudson              | 1                       | 2                 |                       |                      |                                          | 1.6 <sup>10</sup>                                                   | 47               |
| IsoNeb A/ MediMist            | 1                       | 2                 |                       |                      |                                          | 4.2 <sup>10</sup>                                                   | 47               |
| LC Plus/ ProNeb Turbo         | 0.5                     | 2                 | 4.1 <sup>b</sup>      | 2.1                  | 70                                       | 22 <sup>3</sup> /18 <sup>11</sup>                                   | 48               |
| LC Star/ ProNeb Turbo         | 0.5                     | 2                 | 3.8 <sup>b</sup>      | 1.9                  | 77                                       | 18 <sup>3</sup> /13 <sup>11</sup>                                   | 48               |
| VentStream/ PortaNeb 50       | 0.5                     | 2                 | 3.1 <sup>b</sup>      | 2.0                  | 87                                       | 10 <sup>3</sup> /6.5 <sup>11</sup>                                  | 48               |
| LC Star/ProNeb Ultra          | 1                       | 2                 | 5.1 <sup>h</sup>      | 2.0                  | 85                                       | 28 <sup>5</sup>                                                     | 49               |
| eFlow                         | 1                       | 2                 | 3.9 <sup>h</sup>      | 2.3                  | 83                                       | 30 <sup>5</sup>                                                     | 49               |
| LC Plus/ NA                   | 0.5                     | 2                 |                       |                      |                                          | 15 <sup>10</sup>                                                    | 51               |
| Aerodose                      | 0.083                   | 0.3               |                       |                      |                                          | 58 <sup>10</sup>                                                    | 51               |
| LC Plus/ ProNeb Ultra         | 1                       | 2                 | 5.0 <sup>d</sup>      | 4.0                  | 63                                       | 25 <sup>5</sup>                                                     | 33               |
| Multisonic ultrasonic         | 1                       | 2                 | 3.8 <sup>d</sup>      | 3.4                  | 75                                       | 5 <sup>5</sup>                                                      | 33               |
| eFlow Baby                    | 1                       | 2                 | 3.6 <sup>d</sup>      | 3.0                  | 92                                       | 25 <sup>5</sup>                                                     | 33               |
| NEU22                         | 1                       | 2                 |                       |                      |                                          | 7-29 <sup>5</sup>                                                   | 53               |
| Aerodose 5.7                  | 1                       | 2                 | 2.4 <sup>n</sup>      | 2.2                  | 82                                       |                                                                     | 54               |
| LC Star/O2 8 lpm              | 1                       | 2                 | 3.5 <sup>n</sup>      | 1.0                  | 69                                       |                                                                     | 54               |
| Aeroneb Go                    | 0.5                     | 2                 | 3.1 <sup>d</sup>      | 1.6                  |                                          | 22 <sup>6</sup>                                                     | 55               |
| LC Plus/ NA                   | 0.5                     | 2                 | 3.8 <sup>d</sup>      | 2.3                  |                                          | 18 <sup>6</sup>                                                     | 55               |
| LC Plus/ ProNeb Ultra         | 0.5                     | 2                 | 5.3 <sup>1</sup>      | 2.1                  | 47                                       | 25 <sup>5</sup> /12.5 <sup>11</sup> /9 <sup>15</sup>                | 56               |
| eFlowBaby                     | 0.5                     | 2                 | 3.2 <sup>1</sup>      | 1.6                  | 83                                       | 25 <sup>15</sup>                                                    | 56               |
| BimboNeb                      | 0.5                     | 2                 | 4.5 <sup>8</sup>      | 2.3                  | 58-66                                    | 14 <sup>3</sup> /10 <sup>11</sup>                                   | 57               |
| Nebula                        | 0.5                     | 2                 | 3.4 <sup>8</sup>      | 2.2                  | 73-82                                    | 8 <sup>3</sup> /9 <sup>11</sup>                                     | 57               |

ONLINE DATA SUPPLEMENT

|                                       |      |   |                      |     |       |                                                     |       |
|---------------------------------------|------|---|----------------------|-----|-------|-----------------------------------------------------|-------|
| Updraft II/ PulmoAide/ FM             | 0.25 | 2 |                      |     |       | 19 <sup>17</sup> /4 <sup>18</sup>                   | 58    |
| Updraft II/ PulmoAide/ sealed FM      | 0.25 | 2 |                      |     |       | 46 <sup>1</sup> /24 <sup>17</sup> /10 <sup>18</sup> | 58    |
| LC Plus/ Master/ Fish FM              | 0.25 | 2 |                      |     |       | 12 <sup>17</sup> /9 <sup>18</sup>                   | 58    |
| LC Plus/ Master/ sealed               | 0.25 | 2 |                      |     |       | 46 <sup>1</sup> /19 <sup>17</sup> /10 <sup>18</sup> | 58    |
| Cirrus/ Master                        | 1    | 2 | 3.3 <sup>f</sup>     |     | 71    | 12 <sup>5</sup>                                     | 59    |
| LC Plus/ Master                       | 1    | 2 | 4.5 <sup>f</sup>     |     | 51    | 27 <sup>5</sup>                                     | 59    |
| Comp Air Elite                        | 1    | 2 | 7.4 <sup>f</sup>     |     | 8     | 29 <sup>5</sup>                                     | 59    |
| LC Plus/ 7 lpm                        | 0.25 |   | 5.2-5.6 <sup>n</sup> | 2.0 | 21-15 |                                                     | 60    |
| VixOne/7 lpm                          | 0.25 |   | 3.0-5.3 <sup>n</sup> | 1.9 | 20-12 |                                                     | 60    |
| Sidestream/PortaNeb                   | 1    | 2 | <sup>n</sup>         |     | 56    |                                                     | 37    |
| PARI LC Plus/PronebUltra II           | 0.5  | 2 | 4.9 <sup>a</sup>     | 1.7 | 51    | 37 <sup>2</sup>                                     | 61    |
| PARI LC Plus/Proneb Ultra II          | 0.5  | 4 | 4.6 <sup>a</sup>     | 1.8 | 56    | 46 <sup>2</sup>                                     | 61    |
| PARILCPlus/ProNebUltraII              | 0.5  | 2 | 7.4 <sup>i</sup>     | 2.1 | 23    |                                                     | 62-63 |
| PARILCPlus/ProNebUltraII <sup>o</sup> | 0.5  | 2 | 6.8 <sup>i</sup>     | 2.1 | 29    |                                                     | 62-63 |
| MicroPlus/MicroElite                  | 0.5  | 2 | 5.3 <sup>e</sup>     |     | 45    | 10 <sup>6</sup> /7 <sup>19</sup>                    | 65    |
| LC Sprint/Trek S                      | 0.5  | 2 | 5.0 <sup>e</sup>     |     | 47    | 10 <sup>6</sup> /7 <sup>19</sup>                    | 65    |
| LC Plus/Proneb Ultra/ LaerdalFM       | 0.5  | 2 | 7.8 <sup>m</sup>     |     |       | 14 <sup>16</sup>                                    | 64    |
| LC Plus/Proneb Ultra/ FishFM          | 0.5  | 2 | 7.6 <sup>m</sup>     |     |       | 13 <sup>16</sup>                                    | 64    |
| MistyNeb/Proneb Ultra /SalterFM       | 0.5  | 2 | 9.0 <sup>m</sup>     |     |       | 3 <sup>16</sup>                                     | 64    |
| MistyNeb/Proneb Ultra /Fish mask      | 0.5  | 2 | 7.3 <sup>m</sup>     |     |       | 8 <sup>16</sup>                                     | 64    |
| Sidestream/PortaNeb                   | 2    | 4 | 7.1 <sup>l</sup>     | 1.8 | 30    | 27 <sup>5</sup>                                     | 38    |
| NEU22                                 | 0.5  | 1 | 6.4 <sup>l</sup>     | 1.7 | 41    | 35 <sup>5</sup>                                     | 38    |
| AeroEclipseII/ PortaNeb               | 0.5  | 2 | 5.7 <sup>e</sup>     | 1.8 |       | 20 <sup>14</sup>                                    | 68    |
| Assister KN-180                       | 0.5  | 2 | 7.8 <sup>e</sup>     | 1.9 |       | 5 <sup>13</sup> /11 <sup>14</sup>                   | 68    |
| Genki                                 | 0.5  | 2 | 7.3 <sup>e</sup>     | 1.8 |       | 4 <sup>13</sup> /11 <sup>13</sup>                   | 68    |
| Hudson/ PulmoAide 3655                | 0.5  | 2 | 6.1 <sup>e</sup>     | 1.7 |       | 3 <sup>13</sup> /5 <sup>14</sup>                    | 68    |
| Comp Air Elite                        | 0.5  | 2 | 7.0 <sup>e</sup>     | 1.9 |       | 8 <sup>13</sup> /18 <sup>14</sup>                   | 68    |
| Medel SkyNeb                          | 0.5  | 2 | 6.8 <sup>e</sup>     | 1.9 |       | 8 <sup>13</sup> /16 <sup>14</sup>                   | 68    |
| Mefar2000/ Voyage                     | 0.5  | 2 | 7.7 <sup>e</sup>     | 1.8 |       | 6 <sup>13</sup> /12 <sup>14</sup>                   | 68    |
| Mefar2000/ Promenade-car              | 0.5  | 2 | 7.5 <sup>e</sup>     | 1.7 |       | 5 <sup>13</sup> /10 <sup>14</sup>                   | 68    |
| Mefar2000/ EuroSol                    | 0.5  | 2 | 7.8 <sup>e</sup>     | 1.8 |       | 5 <sup>13</sup> /9 <sup>14</sup>                    | 68    |
| MicroMist/ PulmoAide 5650N            | 0.5  | 2 | 6.5 <sup>e</sup>     | 1.8 |       | 3 <sup>13</sup> /11 <sup>14</sup>                   | 68    |
| Millicon S                            | 0.5  | 2 | 7.4 <sup>e</sup>     | 1.8 |       | 7 <sup>13</sup> /15 <sup>14</sup>                   | 68    |
| Nesco Jet AZ 11                       | 0.5  | 2 | 7.7 <sup>e</sup>     | 1.9 |       | 4 <sup>13</sup> /10 <sup>14</sup>                   | 68    |
| Nissho                                | 0.5  | 2 | 9.9 <sup>e</sup>     | 2.1 |       | 9 <sup>13</sup> /15 <sup>14</sup>                   | 68    |
| NE-C13                                | 0.5  | 2 | 6.8 <sup>e</sup>     | 1.8 |       | 4 <sup>13</sup> /10 <sup>13</sup>                   | 68    |
| NE-C16                                | 0.5  | 2 | 6.9 <sup>e</sup>     | 1.8 |       | 7 <sup>13</sup> /10 <sup>14</sup>                   | 68    |
| NE-C28                                | 0.5  | 2 | 5.5 <sup>e</sup>     | 1.7 |       | 3 <sup>13</sup> /8 <sup>14</sup>                    | 68    |
| NE-C30                                | 0.5  | 2 | 5.9 <sup>e</sup>     | 1.7 |       | 3 <sup>13</sup> /9 <sup>14</sup>                    | 68    |
| LC Plus/ ProNeb Turbo                 | 0.5  | 2 | 6.2 <sup>e</sup>     | 1.8 |       | 9 <sup>13</sup> /20 <sup>14</sup>                   | 68    |
| LC Plus/ UniLight                     | 0.5  | 2 | 7.2 <sup>e</sup>     | 1.8 |       | 7 <sup>13</sup> /14 <sup>14</sup>                   | 68    |
| LC Plus Junior/ ProNeb Turbo          | 0.5  | 2 | 7.6 <sup>e</sup>     | 1.8 |       | 9 <sup>13</sup> /18 <sup>14</sup>                   | 68    |
| LC Sprint/ ProNeb Ultra II            | 0.5  | 2 | 5.8 <sup>e</sup>     | 1.8 |       | 4 <sup>13</sup> /12 <sup>14</sup>                   | 68    |
| LC Sprint/ Boy Mobile S               | 0.5  | 2 | 6.1 <sup>e</sup>     | 1.9 |       | 6 <sup>13</sup> /14 <sup>14</sup>                   | 68    |
| LC Sprint/ ProNeb Turbo               | 0.5  | 2 | 6.6 <sup>e</sup>     | 1.8 |       | 14 <sup>14</sup>                                    | 68    |
| LC Sprint Baby/ ProNeb Ultra          | 0.5  | 2 | 4.8 <sup>e</sup>     | 1.7 |       | 4 <sup>13</sup> /9 <sup>14</sup>                    | 68    |
| LC Sprint Junior/ ProNeb Ultra        | 0.5  | 2 | 5.9 <sup>e</sup>     | 1.8 |       | 6 <sup>13</sup> /13 <sup>14</sup>                   | 68    |
| LC Star/ Master                       | 0.5  | 2 | 4.8 <sup>e</sup>     | 1.8 |       | 4 <sup>13</sup> /11 <sup>14</sup>                   | 68    |
| LL/ ProNeb Turbo                      | 0.5  | 2 | 5.8 <sup>e</sup>     | 1.8 |       | 5 <sup>13</sup> /15 <sup>14</sup>                   | 68    |
| SideStream/ VigorMist                 | 0.5  | 2 | 5.3 <sup>e</sup>     | 1.7 |       | 1 <sup>13</sup> / 4 <sup>14</sup>                   | 68    |
| SideStreamPlus/ MiniElite             | 0.5  | 2 | 7.7 <sup>e</sup>     | 1.8 |       | 5 <sup>13</sup> /17 <sup>14</sup>                   | 68    |
| VentStream/ PortaNeb                  | 0.5  | 2 | 5.0 <sup>e</sup>     | 1.7 |       | 8 <sup>14</sup>                                     | 68    |
| Sidestream/ Inspiron Elite            | 0.5  | 2 | 3.7 <sup>e</sup>     |     | 59    |                                                     | 67    |
| Sidestream/ Inspiron Elite            | 0.25 | 2 | 3.9 <sup>e</sup>     |     | 58    |                                                     | 67    |
| Sidestream/ Stratos Pro               | 0.5  | 2 | 4.4 <sup>e</sup>     |     | 58    |                                                     | 67    |
| Sidestream/ Stratos Pro               | 0.25 | 2 | 4.5 <sup>e</sup>     |     | 71    |                                                     | 67    |
| Ventstream/ Elite                     | 0.5  | 2 | 5.0 <sup>e</sup>     |     | 46    |                                                     | 67    |
| Ventstream/ Elite                     | 0.25 | 2 | 4.5 <sup>e</sup>     |     | 51    |                                                     | 67    |
| Ventstream/ Stratos Pro               | 0.5  | 2 | 5.1 <sup>e</sup>     |     | 44    |                                                     | 67    |

ONLINE DATA SUPPLEMENT

|                                    |      |     |                  |     |    |                  |    |
|------------------------------------|------|-----|------------------|-----|----|------------------|----|
| Ventstream/ Stratos Pro            | 0.25 | 2   | 4.5 <sup>e</sup> |     | 50 |                  | 67 |
| Ventstream/ Stratos Portable       | 0.5  | 2   | 3.3 <sup>e</sup> |     | 69 |                  | 67 |
| Ventstream/ Stratos Portable       | 0.25 | 2   | 3.5 <sup>e</sup> |     | 66 |                  | 67 |
| DeVilbiss 800D/ 3655D              | 0.5  | 2   | 4.4 <sup>e</sup> |     | 52 |                  | 67 |
| DeVilbiss 800D/ 3655D              | 0.25 | 2   | 4.5 <sup>e</sup> |     | 50 |                  | 67 |
| DeVilbiss 800D/ TravelAire         | 0.5  | 2   | 3.3 <sup>e</sup> |     | 68 |                  | 67 |
| DeVilbiss 800D/ TravelAire         | 0.25 | 2   | 2.9 <sup>e</sup> |     | 74 |                  | 67 |
| DeVilbiss 800D/ Comp Air XL        | 0.5  | 2   | 4.2 <sup>e</sup> |     | 55 |                  | 67 |
| DeVilbiss 800D/ Comp Air XL        | 0.25 | 2   | 3.6 <sup>e</sup> |     | 62 |                  | 67 |
| LC Plus/ ProNeb Ultra II           | 0.5  | 2   | 7.4 <sup>c</sup> |     | 32 | 23 <sup>20</sup> | 67 |
| LC Plus/ ProNeb Ultra II           | 0.25 | 2   | 6.4 <sup>c</sup> |     | 32 |                  | 67 |
| AeroNeb Go                         | 0.5  | 1   | 5.1 <sup>1</sup> |     |    |                  | 67 |
| AeroNeb Go                         | 0.25 | 1   | 4.9 <sup>1</sup> |     |    |                  | 67 |
| Sidestream/ PortaNeb               | 1    | 4   | 8.3 <sup>1</sup> |     | 23 | 27 <sup>5</sup>  | 39 |
| NEU22                              | 0.25 | 1   | 6.2 <sup>1</sup> |     | 38 | 34 <sup>5</sup>  | 39 |
| SideStream/ AirClinic              | 0.5  | 4.5 | 4.2 <sup>1</sup> | 1.8 | 62 | 37 <sup>1</sup>  | 69 |
| VentStream/ AirClinic              | 0.5  | 4.5 | 4.9 <sup>1</sup> | 1.9 | 52 | 20 <sup>1</sup>  | 69 |
| SideStream/ AirClinic <sup>o</sup> | 0.5  | 4.5 | 5.0 <sup>1</sup> | 3.0 | 50 | 19 <sup>1</sup>  | 69 |
| VentStream/ AirClinic <sup>o</sup> | 0.5  | 4.5 | 4.3 <sup>1</sup> | 1.9 | 61 | 18 <sup>1</sup>  | 69 |

Legend: <sup>o</sup>the experiments were performed mixing ICSs to the bronchodilators; <sup>o</sup>=generic formulation of nebulized Budesonide; FM = FacemaskTV = Tidal Volume; Ti/Ttot = Duty cycle; lpm =liters per minute; bpm = breaths per minute. Breathing pattern: <sup>1</sup>continuous aspiration at a flow of 15 lpm; <sup>2</sup>continuous flow at 28.3 lpm; <sup>3</sup>TV 600 ml, 12 bpm, Ti/Ttot 40%; <sup>4</sup>TV 600 ml, 16 bpm, Ti/Ttot 40%; <sup>5</sup>TV 500 ml, 15 bpm, Ti/Ttot 50%; <sup>6</sup>TV 440 ml, 19 bpm, Ti/Ttot 37%; <sup>9</sup>TV 100 ml, 30 bpm, Ti/Ttot 42%; <sup>10</sup>TV 200 ml, 25 bpm, Ti/Ttot 50%; <sup>11</sup>TV 150 ml, 20 bpm, Ti/Ttot 40%; <sup>12</sup>TV 50 ml, 30 bpm, Ti/Ttot 40%; <sup>13</sup>50 ml, 30 bpm, Ti/Ttot 33%; <sup>14</sup>TV 155 ml, 25 bpm, Ti/Ttot 50%; <sup>15</sup>Sophia Anatomical Infant Nose Throat (SAINT) TV 100 ml, 30 bpm, Ti/Ttot 42%; <sup>16</sup>TV 50 ml, 25 bpm, Ti/Ttot 40%; <sup>17</sup>207 ml, 37 bpm, Ti/Ttot 41%; <sup>18</sup>TV 75 ml, 20 bpm, Ti/Ttot 40%; <sup>6</sup>adult breathing pattern; <sup>19</sup>pediatric breathing pattern; <sup>20</sup>TV 300 ml, 35 bpm, Ti/Ttot 50. Droplet size distribution: <sup>8</sup>-stage Westech ACI at a flow of 28.3 lpm; <sup>o</sup>Respirable fraction expressed as percentage of drug leaving nebulizer in particles respectively <5.0 μm; <sup>4</sup>-stage MSLI impactor at 30 lpm; %RF <6.1 μm; <sup>6</sup>-stage Marple Personal CI SE 296 at 2 lpm; <sup>8</sup>-stage ACI Mark II at 28.3 lpm; %RF <5.8 μm; <sup>o</sup>NGI chilled at 15 lpm; %RF <4.7 μm; <sup>8</sup>-stage ACI impactor at 15 lpm; %RF < 5.0 μm; <sup>8</sup>-stage MSLI impactor; %RF <4.3 μm/6.8 μm; <sup>8</sup>-stage Marple 298 at 2 lpm; %RF < 6 μm; <sup>1</sup>NGI at 15 lpm; %RF <5 μm; <sup>8</sup>-stage Marple 298 at 15 lpm; %RF < 5 μm; <sup>7</sup>-stage Marple at 2 lpm ; %RF <4.7 μm; <sup>8</sup>-stage ACI at 28.3 lpm; %RF <4.7 μm

## ONLINE DATA SUPPLEMENT

Supplementary appendix 3. *In vitro* studies evaluating aerosol properties of nebulized flunisolide and beclomethasone dipropionate

| Nebulizer system                  | Drug | Total drug dosage in mg | Fill volume in ml | MMAD in $\mu\text{m}$ | GDS in $\mu\text{m}$ | Respirable fraction in % of inhaled mass | Inhaled Mass, mean % of label charge | Reference number |
|-----------------------------------|------|-------------------------|-------------------|-----------------------|----------------------|------------------------------------------|--------------------------------------|------------------|
| BimboNeb                          | BDP  | 0.8                     | 2                 | 6.4 <sup>a</sup>      | 1.8                  | 28                                       | 9 <sup>2</sup> /8 <sup>11</sup>      | 50               |
| Nebula                            | BDP  | 0.8                     | 2                 | 5.4 <sup>a</sup>      | 1.9                  | 39                                       | 6 <sup>2</sup> /8 <sup>11</sup>      | 50               |
| BimboNeb                          | FLU  | 0.6                     | 2.6               | 3.9 <sup>a</sup>      | 1.8                  | 60                                       | 15 <sup>2</sup> /9 <sup>11</sup>     | 52               |
| Nebula                            | FLU  | 0.6                     | 2.6               | 3.9 <sup>a</sup>      | 1.9                  | 60                                       | 11 <sup>2</sup> /9 <sup>11</sup>     | 52               |
| Cirrus/Master                     | BDP  | 0.8                     | 2                 | 4.8 <sup>b</sup>      | NA                   | 54                                       | 10 <sup>3</sup>                      | 59               |
| PARI LC Plus/Master               | BDP  | 0.8                     | 2                 | 7.5 <sup>b</sup>      | NA                   | 23                                       | 27 <sup>3</sup>                      | 59               |
| Comp Air Elite                    | BDP  | 0.8                     | 2                 | 10.0 <sup>b</sup>     | NA                   | 26                                       | 37 <sup>3</sup>                      | 59               |
| BimboNeb <sup>o</sup>             | BDP  | 0.8                     | 3                 | 6.3 <sup>a</sup>      | 1.8                  | 29                                       | 23 <sup>2</sup> /16.5 <sup>11</sup>  | 66               |
| BimboNeb <sup>o</sup>             | FLU  | 0.6                     | 3                 | 3.7 <sup>a</sup>      | 2.3                  | 52                                       | 20.5 <sup>2</sup> /17 <sup>11</sup>  | 66               |
| Nebula <sup>o</sup>               | BDP  | 0.8                     | 3                 | 5.3 <sup>a</sup>      | 2.0                  | 39                                       | 14 <sup>2</sup> /15 <sup>11</sup>    | 66               |
| Nebula <sup>o</sup>               | FLU  | 0.6                     | 3                 | 3.7 <sup>a</sup>      | 2.3                  | 50                                       | 11 <sup>2</sup> /12 <sup>11</sup>    | 66               |
| SideStream/AirClinic              | BDP  | 0.8                     | 4.5               | 4.8 <sup>b</sup>      | 1.7                  | 53                                       | 45.5 <sup>1</sup>                    | 69               |
| VentStream/AirClinic              | BDP  | 0.8                     | 4.5               | 5.0 <sup>b</sup>      | 1.8                  | 51                                       | 34 <sup>1</sup>                      | 69               |
| SideStream/AirClinic <sup>o</sup> | BDP  | 0.8                     | 4.5               | 6.2 <sup>b</sup>      | 1.7                  | 35                                       | 37 <sup>1</sup>                      | 69               |
| VentStream/AirClinic <sup>o</sup> | BDP  | 0.8                     | 4.5               | 5.5 <sup>b</sup>      | 1.7                  | 43                                       | 39 <sup>1</sup>                      | 69               |

Legend: <sup>o</sup>the experiments were performed mixing ICS to the bronchodilators. FLU = flunisolide; BDP = beclomethasone dipropionate; TV = Tidal Volume; Ti/Ttot = Duty cycle; bpm = breaths per minute. Breathing pattern imposed to aerosol: <sup>1</sup>continuous aspiration at a flow of 15 lpm; <sup>2</sup>TV 600 ml, 12 bpm, Ti/Ttot 40%; <sup>3</sup>TV 500 ml, 15 bpm, Ti/Ttot 50%; <sup>11</sup>TV 150 ml, 20 bpm, Ti/Ttot 40%; Method evaluating droplet size distribution: <sup>a</sup>4-stage MSLI impactor; % Respirable Fraction <4.3  $\mu\text{m}$ ; <sup>b</sup>8-stage ACI impactor at 15 lpm; % Respirable Fraction < 5.0  $\mu\text{m}$ ; NA = Not available

ONLINE DATA SUPPLEMENT

Supplementary appendix 4. Ex vivo studies of nebulized budesonide in subjects of different ages

| Nebulizer system                 | Subjects, No | Mean age (range) in years | Total drug dose <sup>^</sup> | Inhaled Mass, mean <sup>o</sup> percentage of label claim | Reference number |
|----------------------------------|--------------|---------------------------|------------------------------|-----------------------------------------------------------|------------------|
| Acorn22 Mizer/CR60 <sup>a</sup>  | 6            | (0.3-2.5)                 | 0.5                          | 14                                                        | 80               |
| Spira/7.5 lpm <sup>2,5a</sup>    | 323          | (0.5-7)                   | 0.5                          | 11.4-14.8                                                 | 81               |
| Spira /7.5 lpm <sup>1,5a</sup>   | 323          | (0.5-7)                   | 0.5                          | 10.4-15.2                                                 | 81               |
| Spira/7.5 lpm <sup>2,3a</sup>    | 323          | (5-15)                    | 0.5                          | 8.9-12.7                                                  | 81               |
| Spira /7.5 lpm <sup>1,3a</sup>   | 323          | (5-15)                    | 0.5                          | 19.8-21.5                                                 | 81               |
| Spira/7.5 lpm <sup>2,4a</sup>    | 323          | (5-15)                    | 0.5                          | 5.6-6.9                                                   | 81               |
| Aiolos <sup>1</sup>              | 52           | (0.5-3.3)                 | 0.25                         | 21                                                        | 82               |
| Aiolos <sup>1</sup>              | 50           | (0.5-3.3)                 | 1                            | 24                                                        | 82               |
| PARI LL                          | 38           | 1.5 (0.5-3.3)             | 1                            | 26                                                        | 83               |
| Aiolos                           | 38           | 1.5 (0.5-3.3)             | 1                            | 13                                                        | 83               |
| PARI LC Plus/Master <sup>3</sup> | 12           | 5 (3-6)                   | 1                            | 25                                                        | 84               |
| Spira <sup>1a</sup>              | 164          | (0.5-7.9)                 | 1                            | 11.4-14.9                                                 | 85               |
| Spira <sup>2a</sup>              | 163          | (0.5-7.9)                 | 1                            | 10.5-14.9                                                 | 85               |
| Spira <sup>1</sup>               | 10           | (16-52)                   | 0.5                          | 31 <sup>b</sup>                                           | 76               |
| Spira ultrasonico <sup>1</sup>   | 10           | (16-52)                   | 0.5                          | 10 <sup>b</sup>                                           | 76               |
| Spira <sup>2</sup>               | 11           | 4 (2.5-5.8)               | 0.5                          | 18.7                                                      | 86               |
| Spira <sup>1</sup>               | 11           | 4 (2.5-5.8)               | 0.5                          | 24.0-28.5                                                 | 86               |
| Spira <sup>2</sup>               | 11           | 32 (13-52)                | 1                            | 17                                                        | 86               |
| Spira <sup>1</sup>               | 11           | 32 (13-52)                | 1                            | 31-33                                                     | 86               |
| Spira <sup>3</sup>               | 158          | (5.1-15.7)                | 1                            | 17-22                                                     | 87               |
| Spira <sup>4</sup>               | 158          | (5.1-15.7)                | 1                            | 5-7                                                       | 87               |
| Spira <sup>5</sup>               | 158          | (5.1-15.7)                | 1                            | 9-12                                                      | 87               |

<sup>o</sup>unless otherwise specified; <sup>^</sup> the fill volume was always 2 ml; <sup>a</sup>The time of nebulization was a fixed period of 5 minutes; <sup>b</sup> the result is available as median mass; <sup>1</sup>breath-synchronized nebulization; <sup>2</sup>continuous nebulization; <sup>3</sup>mouthpiece; <sup>4</sup> loosely fitting face mask; <sup>5</sup> tight sealing facemask

## ONLINE DATA SUPPLEMENT

Supplementary appendix 5. Characteristics of randomized placebo-controlled blind studies with nebulized ICSS in acute asthma or COPD exacerbations\*

| Nebulizer setting                                       | Population, number | Mean age (range) in years | Diagnosis                 | Drug | Drug dosage in mg                         | Results*                               | Evaluation times              | Reference number |
|---------------------------------------------------------|--------------------|---------------------------|---------------------------|------|-------------------------------------------|----------------------------------------|-------------------------------|------------------|
| Hudson/ 8 lpm <sup>1</sup>                              | 123                | 0.75 (0.1-1.5)            | Asthma                    | BUD  | 0,5 every 4 hrs                           | ↑HLS; HR, DO, SS: NS                   | Every 24 hrs up to 5 days     | 173              |
| No details <sup>2</sup>                                 | 30                 | (6-18)                    | Mild-to-moderate asthma   | BUD  | 1 every 20 min up to 3 doses              | ↑HLS (at 48 hrs); ↑SS, ↑PEF (at 1 hr)  | At 0.5, 1 and 48 hrs          | 174              |
| Jet/ O2 at 5-6 lpm                                      | 44                 | 4 (2-8)                   | Moderate-to-severe asthma | BUD  | 2                                         | ↑ERD (at 5 hrs); BD, Sp, HR, SS: NS    | Hourly up to 5 hrs            | 175              |
| Whisper Jet <sup>3</sup>                                | 30                 | 10 (6-17)                 |                           | BUD  | 0.05 mg/Kg up to 2 doses                  | ↓ <sub>E</sub> NO, ↑PEF, ↑SS (at 6hrs) | At 1, 3, 6 hrs                | 176              |
| VentStream/PortaNeb50 or Passport Invacare <sup>4</sup> | 137                | 70                        | Moderate-to-severe COPD   | BUD  | 2 qid per day                             | ↑FEV1, ↓PCO2; AE, DO, PO2, SS, BD: NS  | Every 12 hrs up to 3 days     | 177              |
| LC Plus/ 6 lpm                                          | 32                 | 4 (2-7)                   | Moderate asthma           | BUD  | 2                                         | SS, Sp, BD: NS                         | At 0.5, 1,2,4, 24 and 72 hrs) | 178              |
| No details <sup>5</sup>                                 | 100                | (6-18)                    | Severe asthma             | FP   | 0.5 every 15 min up to 3 doses            | ↑SS; PEF, Sp: NS                       | At 2 hrs                      | 179              |
| No details                                              | 26                 | 9 (5-13)                  | Asthma                    | BUD  | 1                                         | ↑PEF ; SS: NS                          | At 1 hr                       | 180              |
| PlastiMed or SunMist /DeVilbiss compressor <sup>6</sup> | 67                 | 10 (6-15)                 | Mild-to-moderate asthma   | BUD  | 1 every 1 hr up to 3 doses and then 1 bid | OCU, BD, PEF, FEV1: NS                 | Every 12 hrs up to 5 days     | 181              |
| AeroFamily <sup>2</sup>                                 | 106                | 64                        | Severe COPD               | BUD  | 1.5 qid                                   | ↑PO2, ↓PCO2, ↑FEV1 (at 10 days); AE:NS | Every 24 hrs up to 10 days    | 182              |

\*all patients were receiving bronchodilator treatment, oxygen and other required treatment as needed; BUD = budesonide; FP =Fluticasone propionate; ltp = liter per minute; bid = bis in die; qid = quarter in die; hrs =hours; min = minutes.; ↓ indicates a significant reduction for a given outcome when the active group is compared to the placebo arm; ↑ indicates a significant increase for a given outcome when the active group si compared to the placebo arm; . NS= Not significant difference between groups; Sp = Oxyhaemoglobin saturation.; PEF =Peak Expiratory Flow rate; FEV1 = Forced Expiratory Volume in one second; AE =adverse events; DO = drop-out rate; PO2 = arterial oxygen tension; PCO2 = arterial carbon dioxide tension; HR = heart rate; SS = symptom score; BD= use of rescue bronchodilator; HLS = hospital length of stay; SCU = systemic corticosteroid use; ERD = emergency room discharge rate; <sub>E</sub>NO= exhaled nitric oxide; <sup>1</sup>includes 27% of children with infiltrates at chest x-Ray; <sup>2</sup>all subjects also received (methyl)prednisolone 1 mg/Kg intramuscularly; <sup>3</sup>not on prior stable ICS or any other corticosteroid use; <sup>4</sup>on prior stable use of 1.5 mg daily beclomethasone dipropionate or equivalent; <sup>5</sup>20-50% of subjects on prior stable ICS use; <sup>6</sup>on prior stable use of 0.8 mg daily beclomethasone dipropionate or equivalent

## ONLINE DATA SUPPLEMENT

Supplementary appendix 6. Characteristics of randomized blind parallel comparison studies including nebulized ICSs in acute asthma or COPD attacks

| Nebulizer setting                          | Population number | Mean age (range) in years | Diagnosis                 | Drug treatments and daily dosage in mg                                                           | Results\$                                                                   | Times of outcomes evaluation                                      | Reference number |
|--------------------------------------------|-------------------|---------------------------|---------------------------|--------------------------------------------------------------------------------------------------|-----------------------------------------------------------------------------|-------------------------------------------------------------------|------------------|
| Hudson/ 8lpm                               | 60                | 0.8 (0.1-1.5)             | Asthma                    | BUD 0.5 every 4 hrs until discharge vs. PRE 4-6 mg/Kg at entry and 1.6-2.6 mg/kg on days 2 and 3 | SS, DO, HLS: NS                                                             | Daily up to hospital discharge                                    | 173 <sup>1</sup> |
| No details                                 | 135               | 33 (18-69)                | Severe asthma             | BUD 20 vs. PRE 30 od vs. PRE 30 x4 every 6 hrs                                                   | PEF: NS                                                                     | At 24 hrs                                                         | 186 <sup>2</sup> |
| No details                                 | 56                | (1-4)                     | Moderate asthma           | FP 1 bid vs. PRE 30 od                                                                           | BD, SS <sup>o</sup> : NS                                                    | Every 24 hrs up to 7 days                                         | 187              |
| No details                                 | 20                | >15                       | Moderate asthma           | FP 2 bid vs. PRE 50 od                                                                           | PEF, AE, DO: NS                                                             | Every 24 hrs up to 10 days                                        | 188              |
| Micromist/O2 at 8 lpm/ FM                  | 80                | 7 (2-12)                  | Moderate-to-severe asthma | BUD 0.8 x 3 every 30 min vs. PRE 2 mg/Kg od                                                      | BUD>PRE for SS, Sp, HR (P<.01) and HLS (P<.001); PEF:NS                     | Hourly up to 6 hrs for Sp, HR, SS; daily up to hospital discharge | 189              |
| No details                                 | 46                | (5-16)                    | Severe asthma             | BUD 2 vs. PRE 2 mg/Kg up to a max of 40 mg                                                       | FEV1, PEF, SS: NS                                                           | At 24 hrs                                                         | 190              |
| No details                                 | 321               | 9 (4-16)                  | Moderate-to-severe asthma | FP 1 bid vs. PRE 2mg/kg for 4 days and then 1 mg/kg for 3 days                                   | FP>PRE for mPEF <sup>o</sup> (P=.034); ePEF <sup>o</sup> , SS, FEV1, AE: NS | Every 24 hrs up to 7 days                                         | 191 <sup>3</sup> |
| Jet nebulizer/ O2 at 5-6 lpm               | 71                | 1 (0.25-2)                | Severe asthma             | BUD 0.25 qid vs. 0.1 IB qid                                                                      | BUD> IB for SS (P<.05) and HLS <sup>o</sup> (P<.01)                         | Every 12 hrs up to hospital discharge                             | 192              |
| VentStream/PortaNeb50 or Passport Invacare | 133               | 70                        | Moderate-to-severe COPD   | BUD 2 qid vs PRE 30 bid                                                                          | PRE>BUD for PCO2; BUD>PRE for AE; FEV1 <sup>o</sup> , SS, PO2, DO: NS;      | Every 12 hrs up to 5 days                                         | 177 <sup>4</sup> |
| PARI LC Plus/ O2 at 6 lpm                  | 34                | 4 (2-7)                   | Moderate asthma           | BUD 2 vs. PRE 1 mg/kg                                                                            | Sp, SS, BD: NS                                                              | At 0.5, 1, 2, 4, 24 and 72 hrs                                    | 178              |
| Medel AeroFamily                           | 106               | 64                        | Severe COPD               | BUD 1.5 qid vs. PRE <sup>5</sup> 40 od                                                           | BUD>PRE for AE; DO, FEV1, Sp: NS                                            | Every 24 hrs up to 10 days                                        | 182              |
| DeVilbiss 646/ PulmoAide                   | 40                | 11 (7-16)                 | Moderate-to-severe asthma | BUD 2 vs BUD 0.5 x 4 every 20 min                                                                | FEV1, SS, Sp: NS                                                            | At 20, 40, 60, 90 min                                             | 193              |

Legend: all patients were receiving bronchodilator treatment, oxygen and other required treatment as needed; BUD = budesonide; FP = fluticasone propionate; PRE = oral prednisolone; ICS = inhaled corticosteroid; IB = ipratropium bromide; od = once daily; bid = twice daily; qid = quater in daily; Sp = Oxyhaemoglobin saturation; m = morning; e = evening; PEF = Peak Expiratory Flow rate; FEV1 = Forced Expiratory Volume in one second; AE = adverse events; DO = drop-out rate; PO2 = Arterial oxygen tension; PCO2 = arterial carbon dioxide tension; HR = heart rate; SS = symptom score; BD = use of rescue bronchodilator; HLS = hospital length of stay; <sup>1</sup>includes 27% of children with infiltrates at chest x-Ray; <sup>2</sup>on prior ICS use at daily dosage of 2mg; <sup>3</sup> 2% on prior stable ICSs use; <sup>4</sup> on prior stable use of 1.5 mg daily beclomethasone dipropionate; <sup>5</sup>the prednisolone was administrated intravenously



List of manufacturers' nebulizer: AeroNeb and AeroDose, Nektar/Aerogen, Mountain View, Ca); LC Plus, LC Sprint, LC Star, LL, Boy, Walk Boyt, Master, ProNeb Ultra, ProNeb Turbo, PARI Pharma GmbH, Munich, Germany; Comp Air Elite (Clenny in Europe), NEU22 MicroAir, Compact XL and Elite, Omron Healthcare, Inc, Vernon Hills, Ill; SideStream, VentStream, CR60, PortaNeb, Philips/Respironics, Pittsburgh, PA; CompMist and MabisMist II, Mabis Healthcare, Inc, Lake Forest, Ill.; Lumiscope 6610, The Lumiscope Company, Inc., East Brunswick, N.J.; Acorn22, Mizer, Vital Signs, Inc, Totowa, N.J.; Aquatower, Medical Industries America, Adel, Iowa; MediMist, AvaNeb, OptiNeb and UpDraft-II, formerly Hudson Respiratory Care Incorporated, now Teleflex Medical, Research Triangle Park, NC; Novair II; VisOne, Stratos, Envoy, Invacare, Napa, Ca; AeroTech II, CIS-US, Bedford, Ma Cirrus, Intersurgical Incorporated, Liverpool, NY; 644, 646, PulmoAide, Traveler DeVilbiss Corp; Somerset, Pa.; Downdraft, Whisper and Fan Jet, Marquest, Englewood, Co.; MB-5, Nebula, Bimboneb ,MarkosMefar, Bovezzo, Italy; MistyNeb, Baxter, Valencia, Ca/Allegiance, McGaw Park, IL; NebuTech, Salter 8900, Salter Labs, Arvin, Ca; Aiolos, Aiolos Medicnsk Teknik, Karlstad, Sweden; Inspiron, Intertech Resources, Inc., Bannockburn, Ill.; Optimist, Unomedical Inc., McAllen, Tex; SPIRA, Respiratory Care Center, Hameenlinna, Finland; AERx, Essence, and Ultra, Aradigm Corporation, Hayward, Ca.; Sonik, Evit Labs, Sacramento, Ca; AeroEclipse, Trudell , London, Canada; Maxin MA-2, Clinova Medical AB, Malmö, Sweden, Multisonic, Schiller Medizintechnik GmbH, Switzerland, Medel, San Polo di Torrile, Parma, Italy
